# Supplementary material for: Comparison of Squamous Cell Carcinoma of the Tongue between Young and Old Patients
Source: PubMed Central journal article supplement — J Pathol Transl Med. 2019 Oct 11;53(6):369–77. doi: 10.4132/jptm.2019.09.16 (PMC6877439; doi:10.4132/jptm.2019.09.16), 2019-10-11
Supplement: jptm-2019-09-16-suppl1.pdf [file jptm-2019-09-16-suppl1.pdf]

**Supplementary Table S1.** Demographics and clinical information according to age

| Characteristic       | Young (<45, n=51) | Old (≥45, n=138) | p-value |
|----------------------|-------------------|------------------|---------|
| Age (yr)             |                   |                  |         |
| Median (95% CI)      | 34.9 (33.3–37.1)  | 61.1 (60.7–64.1) | <.001   |
| Sex                  |                   |                  | .133    |
| Male                 | 26 (51.0)         | 87 (63.0)        |         |
| Female               | 25 (49.0)         | 51 (37.0)        |         |
| Smoking status       |                   |                  | .075    |
| Non- or ex-smoker    | 30 (58.8)         | 90 (65.2)        |         |
| Light smoker         | 10 (19.6)         | 11 (8.0)         |         |
| Heavy smoker         | 11 (21.6)         | 37 (26.8)        |         |
| Alcohol use          |                   |                  | .536    |
| Abstain              | 26 (51.0)         | 69 (50.0)        |         |
| Light drinker        | 18 (35.3)         | 41 (29.7)        |         |
| Heavy drinker        | 7 (13.7)          | 28 (20.3)        |         |
| Adjuvant treatment   |                   |                  | .200    |
| None                 | 20 (39.2)         | 67 (48.6)        |         |
| Radiotherapy         | 20 (39.2)         | 46 (33.3)        |         |
| Chemotherapy         | 0                 | 6 (4.3)          |         |
| Chemo + radiotherapy | 11 (21.6)         | 19 (13.8)        |         |
| Recurrence           | 20 (39.2)         | 43 (31.2)        | .297    |
| Deceased             | 20 (39.2)         | 66 (47.8)        | .291    |

Values are presented as number (%) unless otherwise indicated.  
CI, confidence interval.
