# Supplementary material for: Comparison of Squamous Cell Carcinoma of the Tongue between Young and Old Patients
Source: PubMed Central journal article supplement — J Pathol Transl Med. 2019 Oct 11;53(6):369–77. doi: 10.4132/jptm.2019.09.16 (PMC6877439; doi:10.4132/jptm.2019.09.16), 2019-10-11
Supplement: jptm-2019-09-16-suppl2.pdf [file jptm-2019-09-16-suppl2.pdf]

**Supplementary Table S2.** Demographics and clinical information according to sex

| Characteristic       | Male (n= 113)    | Female (n=76)    | p-value |
|----------------------|------------------|------------------|---------|
| Age (yr)             |                  |                  | .600    |
| Median (95% CI)      | 57.1 (52.9-58.1) | 54.7 (50.5-58.3) |         |
| Smoking status       |                  |                  | < .001  |
| Non- or ex-smoker    | 52 (46.0)        | 68 (89.5)        |         |
| Light smoker         | 17 (15.0)        | 4 (5.3)          |         |
| Heavy smoker         | 44 (38.9)        | 4 (5.3)          |         |
| Alcohol use          |                  |                  | < .001  |
| Abstain              | 30 (26.5)        | 65 (85.5)        |         |
| Light drinker        | 50 (44.2)        | 9 (11.8)         |         |
| Heavy drinker        | 33 (29.2)        | 2 (2.6)          |         |
| Adjuvant treatment   |                  |                  | .668    |
| None                 | 51 (45.1)        | 36 (47.4)        |         |
| Radiotherapy         | 38 (33.6)        | 28 (36.8)        |         |
| Chemotherapy         | 5 (4.4)          | 1 (1.3)          |         |
| Chemo + radiotherapy | 19 (16.8)        | 30 (39.5)        |         |
| Recurrence           | 36 (31.9)        | 27 (35.5)        | .600    |
| Deceased             | 55 (48.7)        | 31 (40.8)        | .286    |

Values are presented as number (%) unless otherwise indicated.  
CI, confidence interval.
