# Supplementary material for: Comparison of Squamous Cell Carcinoma of the Tongue between Young and Old Patients
Source: PubMed Central journal article supplement — J Pathol Transl Med. 2019 Oct 11;53(6):369–77. doi: 10.4132/jptm.2019.09.16 (PMC6877439; doi:10.4132/jptm.2019.09.16), 2019-10-11
Supplement: jptm-2019-09-16-suppl3.pdf [file jptm-2019-09-16-suppl3.pdf]

**Supplementary Table S3.** Histopathological data and stage according to age

| Characteristic                 | Young<br>(<45, n=51) | Old<br>(≥45, n=138) | p-value |
|--------------------------------|----------------------|---------------------|---------|
| Tumor size (cm)                |                      |                     | .998    |
| Mean (95% CI)                  | 2.6 (2.2–3.0)        | 2.7 (2.3–3.0)       |         |
| Depth of invasion (mm)         |                      |                     | .190    |
| Mean (95% CI)                  | 11.9 (9.7–14.1)      | 10.3 (9.1–11.5)     |         |
| Histologic grade               |                      |                     | .021    |
| Well differentiated            | 18 (35.3)            | 71 (51.5)           |         |
| Moderately differentiated      | 21 (41.2)            | 54 (39.1)           |         |
| Poorly differentiated          | 12 (23.5)            | 13 (9.4)            |         |
| Lymphovascular invasion        |                      |                     | .956    |
| Present                        | 12 (23.5)            | 33 (23.9)           |         |
| Absent                         | 39 (76.5)            | 105 (76.1)          |         |
| Perineural invasion            |                      |                     | .596    |
| Present                        | 21 (41.2)            | 51 (37.0)           |         |
| Absent                         | 30 (58.8)            | 87 (63.0)           |         |
| Tumor infiltrating lymphocytes |                      |                     | .481    |
| Low                            | 27 (52.9)            | 81 (58.7)           |         |
| Intermediate                   | 17 (33.3)            | 34 (24.6)           |         |
| High                           | 7 (13.7)             | 23 (16.7)           |         |
| T category                     |                      |                     | .232    |
| T1                             | 6 (11.8)             | 33 (23.9)           |         |
| T2                             | 22 (43.1)            | 47 (34.1)           |         |
| T3                             | 23 (45.1)            | 57 (41.3)           |         |
| T4                             | 0                    | 1 (0.7)             |         |
| N category                     |                      |                     | .490    |
| N0                             | 24 (47.1)            | 76 (55.1)           |         |
| N1                             | 9 (17.6)             | 21 (15.2)           |         |
| N2                             | 9 (17.6)             | 27 (19.6)           |         |
| N3                             | 9 (17.6)             | 14 (10.1)           |         |

Values are presented as number (%) unless otherwise indicated.  
CI, confidence interval.
