# Supplementary material for: Comparison of Squamous Cell Carcinoma of the Tongue between Young and Old Patients
Source: PubMed Central journal article supplement — J Pathol Transl Med. 2019 Oct 11;53(6):369–77. doi: 10.4132/jptm.2019.09.16 (PMC6877439; doi:10.4132/jptm.2019.09.16), 2019-10-11
Supplement: jptm-2019-09-16-suppl4.pdf [file jptm-2019-09-16-suppl4.pdf]

**Supplementary Table S4.** Histopathologic data and stage according to sex

| Characteristic                 | Men (n=113)     | Women (n=76)    | p-value |
|--------------------------------|-----------------|-----------------|---------|
| Tumor size (cm)                |                 |                 | .537    |
| Mean (95% CI)                  | 2.6 (2.3–2.8)   | 2.8 (2.3–3.4)   |         |
| Depth of invasion (mm)         |                 |                 | .503    |
| Mean (95% CI)                  | 10.5 (9.1–11.9) | 11.1 (9.5–12.7) |         |
| Histologic grade               |                 |                 | .704    |
| Well differentiated            | 56 (49.6)       | 33 (43.4)       |         |
| Moderately differentiated      | 43 (38.1)       | 32 (42.1)       |         |
| Poorly differentiated          | 14 (12.4)       | 11 (14.5)       |         |
| Lymphovascular invasion        |                 |                 | .281    |
| Present                        | 30 (26.5)       | 15 (19.7)       |         |
| Absent                         | 83 (73.5)       | 61 (80.3)       |         |
| Perineural invasion            |                 |                 | .352    |
| Present                        | 40 (35.4)       | 32 (42.1)       |         |
| Absent                         | 73 (64.6)       | 44 (57.9)       |         |
| Tumor infiltrating lymphocytes |                 |                 | .107    |
| Low                            | 66 (58.4)       | 42 (55.3)       |         |
| Intermediate                   | 34 (30.1)       | 17 (22.4)       |         |
| High                           | 13 (11.5)       | 17 (22.4)       |         |
| T category                     |                 |                 | .465    |
| T1                             | 27 (23.9)       | 12 (15.8)       |         |
| T2                             | 39 (34.5)       | 30 (39.5)       |         |
| T3                             | 46 (40.7)       | 34 (44.7)       |         |
| T4                             | 1 (0.9)         | 0               |         |
| N category                     |                 |                 | .816    |
| N0                             | 58 (51.3)       | 42 (55.3)       |         |
| N1                             | 17 (15.0)       | 13 (17.1)       |         |
| N2                             | 24 (21.2)       | 12 (15.8)       |         |
| N3                             | 14 (12.4)       | 9 (11.8)        |         |

Values are presented as number (%) unless otherwise indicated.  
CI, confidence interval.
